# Supplementary material for: Clinical Significance of Tumor-Infiltrating Conventional and Plasmacytoid Dendritic Cells in Pancreatic Ductal Adenocarcinoma
Source: MDPI journal article supplement (doi:10.3390/cancers14051216), 2022-02-26
Supplement: s1 [file s1]

**Figure S1** Frequency of whole tumor area (WTA)-infiltrating dendritic cell (DC) subsets across distinct pathological tumor (pT) and Union for International Cancer Control (UICC) stages of pancreatic ductal adenocarcinoma (PDAC) patients. Boxplots depict the density of WTA-infiltrating conventional DCs type 1 (cDC1s) (n = 40), type 2 (cDC2s) (n = 40), and plasmacytoid DCs (pDCs) (n = 58) across different (A, C, E) pT stages and (B, D, F) UICC stages. *p* values were calculated using the Mann-Whitney U test and  $p \leq 0.05$  was considered significant.

**Figure S2** Frequency of tumor stroma (TS)-infiltrating dendritic cell (DC) subsets across distinct pathological tumor (pT) and Union for International Cancer Control (UICC) stages of pancreatic ductal adenocarcinoma (PDAC) patients. Boxplots show the frequency of TS- infiltrating conventional DCs type 1 (cDC1s) (n = 40), type 2 (cDC2s) (n = 40), and plasmacytoid DCs (pDCs) (n = 58) across different (A, C, E) pT stages or (B, D, F) UICC stages. *p* values were calculated using the Mann-Whitney U test and  $p \leq 0.05$  was considered significant.

**Table S1** Higher densities of intraepithelial tumor (IET)-infiltrating conventional dendritic cells type 1 (cDC1s) do not influence disease-free survival (DFS) and overall survival (OS). Hazard ratios (HR) and 95% confidence intervals (CI) are shown. Abbreviations: pT: pathological tumor, pN: pathological node.  $p \leq 0.05$  was considered significant. \*  $p < 0.05$

**Table S2** Higher frequencies of whole tumor area (WTA)-infiltrating conventional dendritic cells type 2 (cDC2s) do not alter disease-free survival (DFS) and overall survival (OS). Hazard ratios (HR) and 95% confidence intervals (CI) are shown. Abbreviations: pT: pathological tumor, pN: pathological node.  $p \leq 0.05$  was considered significant. \*  $p < 0.05$

**Table S3** Higher densities of intraepithelial tumor (IET)-infiltrating conventional dendritic cells type 2 (cDC2s) do not modulate disease-free survival (DFS) and overall survival (OS). Hazard ratios (HR) and 95% confidence intervals (CI) are shown. Abbreviations: pT: pathological tumor, pN: pathological node.  $p \leq 0.05$  was considered significant. \*  $p < 0.05$

**Table S4** Higher frequencies of tumor stroma (TS)-infiltrating conventional dendritic cells type 2 (cDC2s) do not influence disease-free survival (DFS) and overall survival (OS). Hazard ratios (HR) and 95% confidence intervals (CI) are shown. Abbreviations: pT: pathological tumor, pN: pathological node.  $p \leq 0.05$  was considered significant. \*  $p < 0.05$

**Table S5** Higher densities of intraepithelial tumor (IET)-infiltrating plasmacytoid dendritic cells (pDCs) do not alter disease-free survival (DFS) and overall survival (OS). Hazard ratios (HR) and 95% confidence intervals (CI) are shown. Abbreviations: pT: pathological tumor, pN: pathological node.  $p \leq 0.05$  was considered significant. \*  $p < 0.05$ , \*\*  $p < 0.01$ , \*\*\*  $p < 0.001$
