# Supplementary material for: Clinical Significance of Tumor-Infiltrating Conventional and Plasmacytoid Dendritic Cells in Pancreatic Ductal Adenocarcinoma
Source: Cancers (Basel). 2022 Feb 26;14(5):1216. doi: 10.3390/cancers14051216 (PMC8909898; doi:10.3390/cancers14051216)
Supplement: Supplementary file 1 [file cancers-14-01216-s001.zip]

Archive with 8 entries (8 files):
- Figure S1.tif
- Figure S2.tif
- Supplementary Material - Legends.pdf
- Table S1.tif
- Table S2.tif
- Table S3.tif
- Table S4.tif
- Table S5.tif
